# Supplementary material for: Is centrifugal ultrafiltration a robust method for determining encapsulation efficiency of pesticide nanoformulations?
Source: Royal Society of Chemistry journal article supplement (doi:10.1039/d0nr08693b), 2021-01-01
Supplement: d0nr08693b1.pdf [file d0nr08693b1.pdf]

Supplementary information for

**Is centrifugal ultrafiltration a robust method for determining encapsulation efficiency of pesticide nanoformulations?**

Rocío López-Cabeza<sup>a</sup>, Melanie Kah<sup>b</sup>, Renato Grillo<sup>c</sup>, Zuzana Bílková<sup>a</sup>, Jakub Hofman<sup>a\*</sup>

<sup>a</sup> Research Centre for Toxic Compounds in the Environment (RECETOX), Faculty of Science, Masaryk University, Kamenice 753/5, Brno, 625 00, Czech Republic

<sup>b</sup> School of Environment, University of Auckland, 23 Symonds Street, Auckland, 1010, New Zealand.

<sup>c</sup> São Paulo State University (UNESP), Department of Physics and Chemistry, School of Sciences and Engineering, Ilha Solteira, SP, 15385-000, Brazil.

\* corresponding author: [jakub.hofman@recetox.muni.cz](mailto:jakub.hofman@recetox.muni.cz)

Number of tables: 8

Number of figures: 1

**Figure S1.** Centrifugal ultrafiltration devices used in this work. In the figure the length of the devices, the maximum sample volume ( $V_{\text{max}}$ ) and the active area of their membranes are indicated.

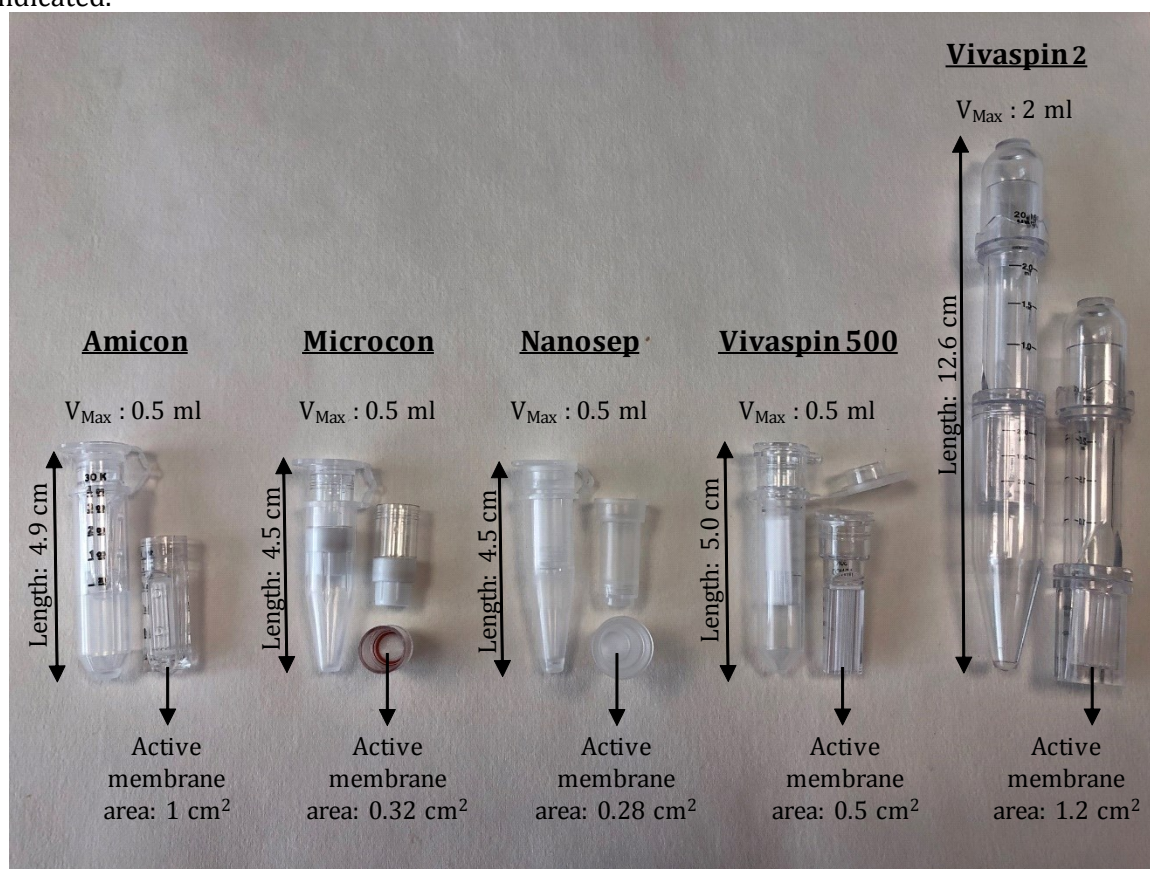

**Table S1.** Main physicochemical properties and chemical structure of chlorpyrifos (CLP), tebuconazole (TBZ) and terbuthilazine (TBA) from Pesticides Properties DataBase.<sup>1</sup>

|     | $M_w^a$<br>(g mol <sup>-1</sup> ) | $S_w^b$<br>(mg l <sup>-1</sup> ) | Log $K_{ow}^c$ | $P_v^d$<br>(mPa) | $H^e$<br>(Pa m <sup>3</sup> mol <sup>-1</sup> ) | Chemical structure                                                                  |
|-----|-----------------------------------|----------------------------------|----------------|------------------|-------------------------------------------------|-------------------------------------------------------------------------------------|
| CLP | 350.6                             | 1.0                              | 4.7            | 1.43             | 0.478                                           | 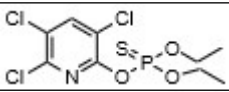 |
| TBZ | 307.8                             | 36.0                             | 3.7            | 0.0013           | $1 \times 10^{-5}$                              |  |
| TBA | 229.7                             | 6.6                              | 3.4            | 0.152            | $2.3 \times 10^{-3}$                            |  |

<sup>a</sup>  $M_w$ : molecular mass

<sup>b</sup>  $S_w$ : solubility in water at 20 °C

<sup>c</sup>  $K_{ow}$ : octanol-water partition coefficient at pH 7, 20 °C

<sup>d</sup>  $P_v$ : vapor pressure at 20 °C

<sup>e</sup> H: Henry's law constant at 25 °C

**Table S2.** Physicochemical characterization of the nanoformulations poly( $\epsilon$ -caprolactone) loaded with tebuconazole (PCL-TBZ) and with terbuthylazine (PCL-TBA).

|         | <b>Total concentration<br/>(<math>\mu\text{g/ml}</math>)</b> | <b>Particle size<br/>(nm)</b> | <b>Polydispersity index</b> | <b>Zeta potential<br/>(mV)</b> |
|---------|--------------------------------------------------------------|-------------------------------|-----------------------------|--------------------------------|
| PCL-TBZ | $449.3 \pm 10.9$                                             | $238.0 \pm 1.9$               | $0.173 \pm 0.021$           | $-41.4 \pm 0.7$                |
| PCL-TBA | $258.8 \pm 18.75$                                            | $282.4 \pm 3.1$               | $0.201 \pm 0.004$           | $-38.4 \pm 0.4$                |

**Table S3.** Centrifugation conditions for each centrifugal ultrafiltration device tested.

| <b>Device</b>                                                             | <b>Rotor type</b> | <b>Spin Speed x g</b> | <b>Time (min)</b> |
|---------------------------------------------------------------------------|-------------------|-----------------------|-------------------|
| Microcon<br>Amicon<br>Nanosep-O<br>Nanosep-B<br>Nanosep-G<br>Vivaspin 500 | Fixed angle       | 14000                 | 30                |
| Vivaspin 2-PES<br>Vivaspin 2-CTA<br>Vivaspin 2-HY                         | Swing bucket      | 3100                  | 30                |

**Table S4.** Concentration and mass of chlorpyrifos (CLP) in the filtrate, water rinse, tube rinse and filter rinse. The CLP mass in tube rinse was calculated without considering (Tube rinse) and considering (Tube rinse + non-desorbed) the desorption of AI from tube material after extraction with methanol (Table 3).

| Device         |                           | Concentration<br>( $\mu\text{g/ml}$ ) | Mass<br>( $\mu\text{g}$ ) |
|----------------|---------------------------|---------------------------------------|---------------------------|
|                |                           | CLP unfiltered                        | $0.50 \pm 0.02^*$         |
| Microcon       | Filtrate                  | <LOQ                                  | <LOQ                      |
|                | Water rinse               | <LOQ                                  | <LOQ                      |
|                | Tube rinse                | $0.005 \pm 0.001$                     | $0.002 \pm 0.000$         |
|                | Tube rinse + non-desorbed |                                       | $0.004 \pm 0.001$         |
|                | Filter rinse              | $0.34 \pm 0.05$                       | $0.17 \pm 0.02$           |
| Amicon         | Filtrate                  | <LOQ                                  | <LOQ                      |
|                | Water rinse               | <LOQ                                  | <LOQ                      |
|                | Tube rinse                | <LOQ                                  | <LOQ                      |
|                | Filter rinse              | $0.30 \pm 0.01$                       | $0.15 \pm 0.01$           |
| Nanosep-O      | Filtrate                  | <LOQ                                  | <LOQ                      |
|                | Water rinse               | <LOQ                                  | <LOQ                      |
|                | Tube rinse                | <LOQ                                  | <LOQ                      |
|                | Filter rinse              | $0.44 \pm 0.02$                       | $0.22 \pm 0.01$           |
| Nanosep-B      | Filtrate                  | <LOQ                                  | <LOQ                      |
|                | Water rinse               | $0.001 \pm 0.001$                     | $0.003 \pm 0.000$         |
|                | Tube rinse                | $0.009 \pm 0.002$                     | $0.005 \pm 0.001$         |
|                | Tube rinse + non-desorbed |                                       | $0.007 \pm 0.001$         |
|                | Filter rinse              | $0.329 \pm 0.005$                     | $0.164 \pm 0.003$         |
| Nanosep-G      | Filtrate                  | <LOQ                                  | <LOQ                      |
|                | Water rinse               | <LOQ                                  | <LOQ                      |
|                | Tube rinse                | <LOQ                                  | <LOQ                      |
|                | Filter rinse              | $0.390 \pm 0.030$                     | $0.195 \pm 0.015$         |
|                | CLP unfiltered            | $0.48 \pm 0.01$                       | $0.24 \pm 0.01$           |
| Vivaspin 500   | Filtrate                  | <LOQ                                  | <LOQ                      |
|                | Water rinse               | <LOQ                                  | <LOQ                      |
|                | Tube rinse                | <LOQ                                  | <LOQ                      |
|                | Filter rinse              | $0.41 \pm 0.01$                       | $0.20 \pm 0.00$           |
| Vivaspin 2-PES | Filtrate                  | <LOQ                                  | <LOQ                      |
|                | Water rinse               | <LOQ                                  | <LOQ                      |
|                | Tube rinse                | <LOQ                                  | <LOQ                      |
|                | Filter rinse              | $0.44 \pm 0.01$                       | $0.22 \pm 0.00$           |
| Vivaspin 2-CTA | Filtrate                  | <LOQ                                  | <LOQ                      |
|                | Water rinse               | <LOQ                                  | <LOQ                      |
|                | Tube rinse                | <LOQ                                  | <LOQ                      |
|                | Filter rinse              | $0.34 \pm 0.02$                       | $0.17 \pm 0.01$           |
| Vivaspin 2-HY  | Filtrate                  | <LOQ                                  | <LOQ                      |
|                | Water rinse               | <LOQ                                  | <LOQ                      |
|                | Tube rinse                | $0.004 \pm 0.000$                     | $0.002 \pm 0.000$         |
|                | Filter rinse              | $0.28 \pm 0.03$                       | $0.14 \pm 0.02$           |

| Device |                | Concentration<br>( $\mu\text{g/ml}$ ) | Mass<br>( $\mu\text{g}$ ) |
|--------|----------------|---------------------------------------|---------------------------|
|        | TBZ unfiltered | $0.46 \pm 0.00^*$                     | $0.23 \pm 0.00$           |

\*Value  $\pm$  Standard deviation

**Table S5.** Concentration and mass of tebuconazole (TBZ) in the filtrate, water rinse, tube rinse and filter rinse. The TBZ mass in tube rinse was calculated without considering (Tube rinse) and considering (Tube rinse + non-desorbed) the desorption of AI from tube material after extraction with methanol (Table 3).

|                    |                           |                      |               |
|--------------------|---------------------------|----------------------|---------------|
| Microcon           | Filtrate                  | 0.348 ± 0.019        | 0.174 ± 0.010 |
|                    | Water rinse               | 0.036 ± 0.003        | 0.018 ± 0.002 |
|                    | Tube rinse                | 0.005 ± 0.000        | 0.002 ± 0.000 |
| <b>Device</b>      | Tube rinse + non-desorbed | <b>Concentration</b> | <b>Mass</b>   |
|                    | Filter rinse              | 0.001 ± 0.001        | 0.001 ± 0.000 |
| Amicon<br>Microcon | TBA unfiltered            | 0.46 ± 0.000         | 0.23 ± 0.000  |
|                    | Filtrate                  | 0.388 ± 0.010        | 0.184 ± 0.005 |
|                    | Water rinse               | 0.015 ± 0.000        | 0.008 ± 0.000 |
|                    | Tube rinse                | EQ                   | EQ            |
|                    | Filter rinse              | 0.454 ± 0.006        | 0.227 ± 0.003 |
| Nanosep-O          | Filtrate                  | 0.044 ± 0.005        | 0.022 ± 0.002 |
|                    | Water rinse               | 0.028 ± 0.001        | 0.014 ± 0.001 |
|                    | Tube rinse                | 0.003 ± 0.000        | 0.001 ± 0.000 |
|                    | Tube rinse + non-desorbed |                      | 0.005 ± 0.000 |
|                    | Filter rinse              | 0.422 ± 0.013        | 0.211 ± 0.006 |
| Nanosep-B          | Filtrate                  | 0.267 ± 0.009        | 0.134 ± 0.004 |
|                    | Water rinse               | 0.194 ± 0.021        | 0.097 ± 0.011 |
|                    | Tube rinse                | 0.002 ± 0.000        | 0.001 ± 0.000 |
|                    | Tube rinse + non-desorbed |                      | 0.003 ± 0.001 |
|                    | Filter rinse              | 0.045 ± 0.007        | 0.211 ± 0.006 |
| Nanosep-G          | Filtrate                  | 0.265 ± 0.023        | 0.133 ± 0.012 |
|                    | Water rinse               | 0.227 ± 0.017        | 0.113 ± 0.009 |
|                    | Tube rinse                | 0.006 ± 0.001        | 0.003 ± 0.000 |
|                    | Tube rinse + non-desorbed |                      | 0.009 ± 0.002 |
|                    | Filter rinse              | 0.029 ± 0.010        | 0.015 ± 0.005 |
| Vivasprin 500      | Filtrate                  | 0.004 ± 0.003        | 0.002 ± 0.001 |
|                    | Water rinse               | 0.004 ± 0.002        | 0.002 ± 0.001 |
|                    | Tube rinse                | < LOQ                | < LOQ         |
|                    | Filter rinse              | 0.434 ± 0.025        | 0.217 ± 0.013 |
|                    | TBZ unfiltered            | 0.429 ± 0.006        | 0.214 ± 0.003 |
| Vivaspin 2-PES     | Filtrate                  | < LOQ                | < LOQ         |
|                    | Water rinse               | < LOQ                | < LOQ         |
|                    | Tube rinse                | < LOQ                | < LOQ         |
|                    | Filter rinse              | 0.396 ± 0.015        | 0.198 ± 0.007 |
| Vivaspin 2-CTA     | Filtrate                  | < LOQ                | < LOQ         |
|                    | Water rinse               | < LOQ                | < LOQ         |
|                    | Tube rinse                | < LOQ                | < LOQ         |
|                    | Filter rinse              | 0.494 ± 0.012        | 0.247 ± 0.006 |
| Vivaspin 2-HY      | Filtrate                  | 0.329 ± 0.007        | 0.165 ± 0.004 |
|                    | Water rinse               | 0.054 ± 0.002        | 0.027 ± 0.001 |
|                    | Tube rinse                | 0.005 ± 0.000        | 0.003 ± 0.000 |
|                    | Tube rinse + non-desorbed |                      | 0.010 ± 0.001 |
|                    | Filter rinse              | 0.040 ± 0.003        | 0.020 ± 0.001 |

\*Value ± Standard deviation

**Table S6.** Concentration and mass of terbuthylazine (TBA) in the filtrate, water rinse, tube rinse and filter rinse.



|                |                |               |               |
|----------------|----------------|---------------|---------------|
|                | Tube rinse     | < LOQ         | < LOQ         |
|                | Filter rinse   | 0.052 ± 0.003 | 0.026 ± 0.002 |
| Amicon         | Filtrate       | 0.063 ± 0.006 | 0.032 ± 0.003 |
|                | Water rinse    | 0.049 ± 0.002 | 0.024 ± 0.001 |
|                | Tube rinse     | < LOQ         | < LOQ         |
|                | Filter rinse   | 0.343 ± 0.032 | 0.172 ± 0.016 |
| Nanosep-O      | Filtrate       | 0.160 ± 0.002 | 0.080 ± 0.001 |
|                | Water rinse    | 0.016 ± 0.002 | 0.008 ± 0.001 |
|                | Tube rinse     | < LOQ         | < LOQ         |
|                | Filter rinse   | 0.287 ± 0.012 | 0.144 ± 0.006 |
| Nanosep-B      | Filtrate       | 0.333 ± 0.006 | 0.167 ± 0.003 |
|                | Water rinse    | 0.094 ± 0.002 | 0.047 ± 0.001 |
|                | Tube rinse     | < LOQ         | < LOQ         |
|                | Filter rinse   | 0.026 ± 0.003 | 0.013 ± 0.001 |
| Nanosep-G      | Filtrate       | 0.384 ± 0.012 | 0.192 ± 0.006 |
|                | Water rinse    | 0.058 ± 0.002 | 0.029 ± 0.001 |
|                | Tube rinse     | < LOQ         | < LOQ         |
|                | Filter rinse   | 0.010 ± 0.001 | 0.005 ± 0.000 |
| Vivaspin 500   | Filtrate       | 0.028 ± 0.014 | 0.014 ± 0.007 |
|                | Water rinse    | 0.006 ± 0.002 | 0.003 ± 0.001 |
|                | Tube rinse     | < LOQ         | < LOQ         |
|                | Filter rinse   | 0.394 ± 0.023 | 0.197 ± 0.012 |
|                | TBA unfiltered | 0.389 ± 0.006 | 0.195 ± 0.003 |
| Vivaspin 2-PES | Filtrate       | < LOQ         | < LOQ         |
|                | Water rinse    | < LOQ         | < LOQ         |
|                | Tube rinse     | < LOQ         | < LOQ         |
|                | Filter rinse   | 0.371 ± 0.005 | 0.185 ± 0.003 |
| Vivaspin 2-CTA | Filtrate       | 0.005 ± 0.001 | 0.003 ± 0.000 |
|                | Water rinse    | 0.114 ± 0.005 | 0.057 ± 0.003 |
|                | Tube rinse     | 0.002 ± 0.000 | 0.001 ± 0.000 |
|                | Filter rinse   | 0.299 ± 0.004 | 0.149 ± 0.002 |
| Vivaspin 2-HY  | Filtrate       | 0.318 ± 0.005 | 0.159 ± 0.003 |
|                | Water rinse    | 0.033 ± 0.002 | 0.016 ± 0.001 |
|                | Tube rinse     | 0.003 ± 0.000 | 0.001 ± 0.000 |
|                | Filter rinse   | 0.042 ± 0.003 | 0.021 ± 0.002 |

\*Value ± Standard deviation

**Table S7.** Mass of AI in the filtrate, water rinse, tube rinse and filter rinse after centrifugal ultrafiltration of undiluted and diluted (10 and 100 times) samples of PCL-TBZ and PCL-TBA using Microcon device. Mass of the AI free in the supernatant ( $m_{free}$ ) was calculated as the sum of the mass of AI in the filtrate, in the tube and in the filter. The TBZ mass in tube rinse was calculated without considering (Tube rinse) and considering (Tube rinse + non-desorbed) the desorption with methanol (Table 3). Encapsulation efficiency (EE) was determined according to Eq. (4) from the  $m_{free}$  given in this table

\*Value ± Standard deviation

|              |                           | <b>Mass (µg)</b> | <b>m<sub>free</sub> (µg)</b> | <b>EE (%)</b> |
|--------------|---------------------------|------------------|------------------------------|---------------|
| PCL-TBZ      | Filtrate                  | 4.402 ± 0.081*   | 5.80 ± 0.28                  | 97.2 ± 4.6    |
|              | Water rinse               | 0.356 ± 0.091    |                              |               |
|              | Tube rinse                | 0.008 ± 0.001    |                              |               |
|              | Tube rinse + non-desorbed | 0.049 ± 0.004    |                              |               |
|              | Filter rinse              | 1.345 ± 0.320    |                              |               |
| PCL-TBZ d10  | Filtrate                  | 3.201 ± 0.045    | 4.31 ± 0.10                  | 80.5 ± 0.4    |
|              | Water rinse               | 0.289 ± 0.009    |                              |               |
|              | Tube rinse                | 0.011 ± 0.005    |                              |               |
|              | Tube rinse + non-desorbed | 0.071 ± 0.031    |                              |               |
|              | Filter rinse              | 1.079 ± 0.055    |                              |               |
| PCL-TBZ d100 | Filtrate                  | 1.254 ± 0.028    | 1.57 ± 0.07                  | 26.7 ± 4.9    |
|              | Water rinse               | 0.237 ± 0.036    |                              |               |
|              | Tube rinse                | 0.006 ± 0.001    |                              |               |
|              | Tube rinse + non-desorbed | 0.020 ± 0.003    |                              |               |
|              | Filter rinse              | 0.299 ± 0.043    |                              |               |
| PCL-TBA      | Filtrate                  | 2.189 ± 0.063    | 13.43 ± 2.20                 | 91.2 ± 15.3   |
|              | Water rinse               | 0.962 ± 0.121    |                              |               |
|              | Tube rinse                | 0.009 ± 0.002    |                              |               |
|              | Filter rinse              | 11.24 ± 2.24     |                              |               |
|              |                           |                  |                              |               |
| PCL-TBA d10  | Filtrate                  | 1.704 ± 0.037    | 2.702 ± 0.04                 | 73.4 ± 5.3    |
|              | Water rinse               | 0.221 ± 0.021    |                              |               |
|              | Tube rinse                | 0.005 ± 0.001    |                              |               |
|              | Filter rinse              | 0.985 ± 0.075    |                              |               |
|              |                           |                  |                              |               |
| PCL-TBA d100 | Filtrate                  | 0.471 ± 0.018    | 0.731 ± 0.05                 | 40.8 ± 9.2    |
|              | Water rinse               | 0.092 ± 0.009    |                              |               |
|              | Tube rinse                | 0.002 ± 0.000    |                              |               |
|              | Filter rinse              | 0.258 ± 0.035    |                              |               |
|              |                           |                  |                              |               |

**Table S8.** Mass of AI in the filtrate, water rinse, tube rinse and filter rinse after centrifugal ultrafiltration of undiluted and diluted (10 and 100 times) samples of PCL-TBZ and PCL-TBA using Vivaspin 2-HY device. Mass of the AI free in the supernatant ( $m_{\text{free}}$ ) was calculated as the sum of the mass of AI in the filtrate, in the tube and in the filter. The TBZ mass in tube rinse was calculated without considering (Tube rinse) and considering (Tube rinse + non-desorbed) the

|              |                           | Mass ( $\mu\text{g}$ ) | $m_{\text{free}}$ ( $\mu\text{g}$ ) | EE (%)          |
|--------------|---------------------------|------------------------|-------------------------------------|-----------------|
| PCL-TBZ      | Filtrate                  | $4.323 \pm 0.182^*$    | $8.953 \pm 1.15$                    | $96.0 \pm 3.4$  |
|              | Water rinse               | $1.096 \pm 0.120$      |                                     |                 |
|              | Tube rinse                | $0.030 \pm 0.010$      |                                     |                 |
|              | Tube rinse + non-desorbed | $0.114 \pm 0.015$      |                                     |                 |
|              | Filter rinse              | $4.516 \pm 1.073$      |                                     |                 |
| PCL-TBZ d10  | Filtrate                  | $3.001 \pm 0.042$      | $5.512 \pm 0.31$                    | $74.8 \pm 2.9$  |
|              | Water rinse               | $1.340 \pm 0.179$      |                                     |                 |
|              | Tube rinse                | $0.040 \pm 0.008$      |                                     |                 |
|              | Tube rinse + non-desorbed | $0.151 \pm 0.030$      |                                     |                 |
|              | Filter rinse              | $2.359 \pm 0.241$      |                                     |                 |
| PCL-TBZ d100 | Filtrate                  | $1.176 \pm 0.011$      | $1.420 \pm 0.01$                    | $32.8 \pm 2.3$  |
|              | Water rinse               | $0.190 \pm 0.012$      |                                     |                 |
|              | Tube rinse                | $0.013 \pm 0.001$      |                                     |                 |
|              | Tube rinse + non-desorbed | $0.049 \pm 0.003$      |                                     |                 |
|              | Filter rinse              | $0.195 \pm 0.007$      |                                     |                 |
| PCL-TBA      | Filtrate                  | $1.792 \pm 0.033$      | $7.212 \pm 2.21$                    | $94.4 \pm 10.1$ |
|              | Water rinse               | $0.392 \pm 0.078$      |                                     |                 |
|              | Tube rinse                | $0.005 \pm 0.001$      |                                     |                 |
|              | Filter rinse              | $5.415 \pm 2.291$      |                                     |                 |
| PCL-TBA d10  | Filtrate                  | $1.677 \pm 0.015$      | $2.758 \pm 0.21$                    | $86.5 \pm 18.1$ |
|              | Water rinse               | $0.412 \pm 0.231$      |                                     |                 |
|              | Tube rinse                | $0.005 \pm 0.001$      |                                     |                 |
|              | Filter rinse              | $1.072 \pm 0.192$      |                                     |                 |
| PCL-TBA d100 | Filtrate                  | $0.603 \pm 0.004$      | $0.732 \pm 0.02$                    | $33.8 \pm 3.1$  |
|              | Water rinse               | $0.050 \pm 0.008$      |                                     |                 |
|              | Tube rinse                | $0.002 \pm 0.000$      |                                     |                 |
|              | Filter rinse              | $0.127 \pm 0.015$      |                                     |                 |

desorption of AI from tube material after extraction with methanol (Table 3). Encapsulation efficiency (EE) was determined according to Eq. (4) from the  $m_{\text{free}}$  given in this table.

\*Value  $\pm$  Standard deviation

## References

- 1 K. A. Lewis, J. Tzilivakis, D. J. Warner and A. Green, *Hum. Ecol. Risk Assess.*, 2016, **22**, 1050–1064.
